# Supplementary material for: Prenatal Manganese Exposure and Long-Term Neuropsychological Development at 4 Years of Age in a Population-Based Birth Cohort
Source: MDPI journal article supplement (doi:10.3390/ijerph17051665), 2020-03-04
Supplement: s1 [file s1]

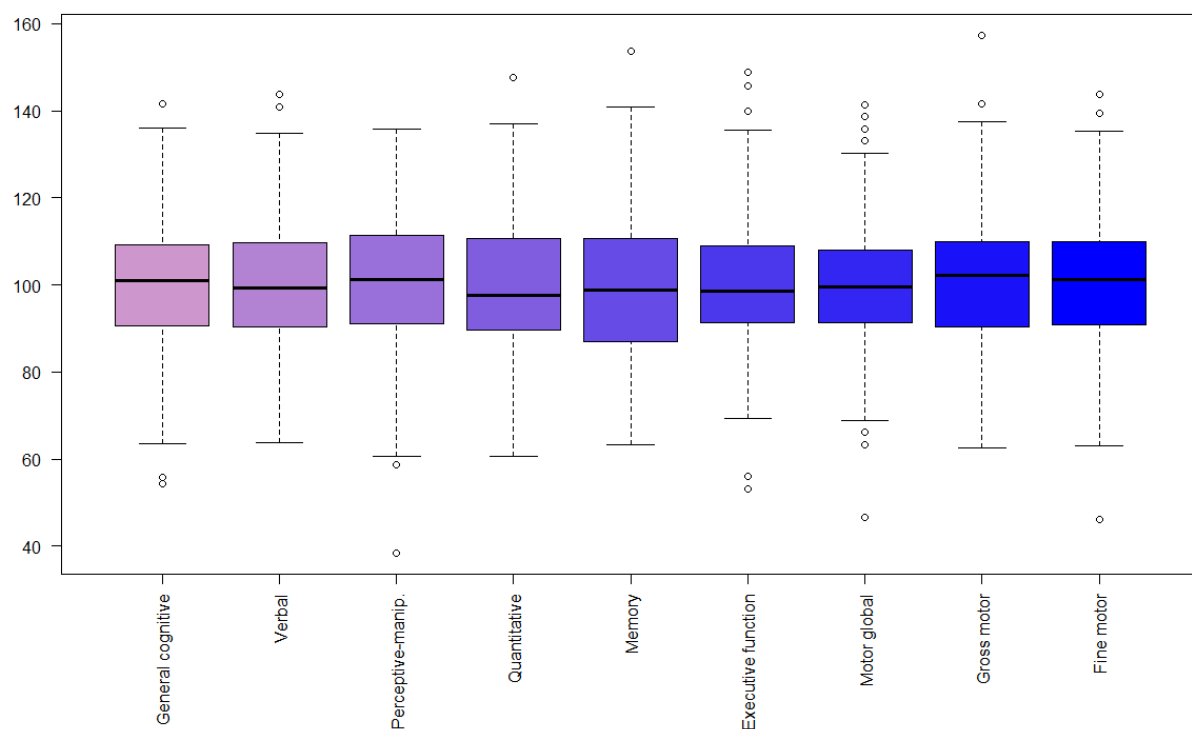

**Figure S1.** McCarthy scales plots

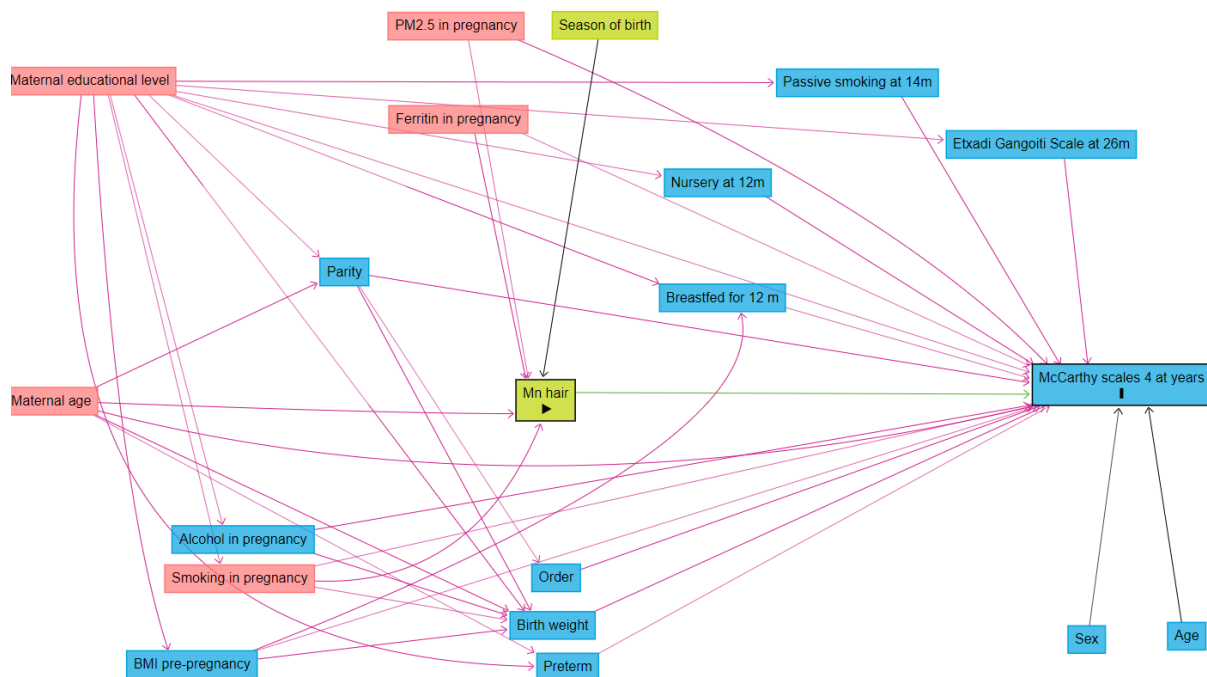

**Figure S2.** Directed acyclic graph to select the covariates included in the analyses. Note: Yellow node represents the exposure; blue box with an "I" represents the outcome; blue boxes represent the ancestor of the outcome; red boxes represent the confounders. The minimally sufficient

adjustment set included was: PM<sub>2.5</sub> pregnancy, ferritin in pregnancy, maternal age at conception and smoking in pregnancy.

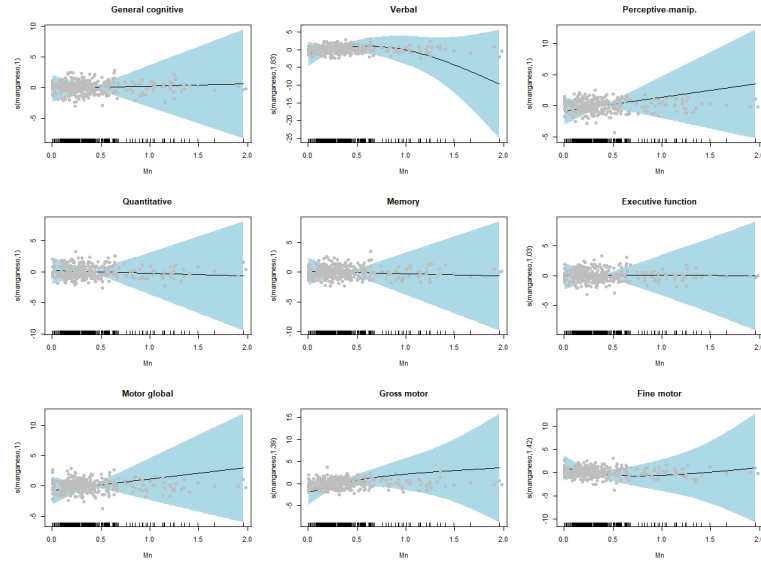

Figure S3. General additive models.

Table S1. Sensitivity analysis: differences between our participants and the whole cohort

| N=304                          |             |               | N=334                  |             |             |                        |              |
|--------------------------------|-------------|---------------|------------------------|-------------|-------------|------------------------|--------------|
|                                |             |               | Number of missing data |             |             | Number of missing data |              |
|                                | N (%)       | mean (sd)     |                        | N (%)       | mean (sd)   |                        | <i>p</i>     |
| <i>Mother characteristics</i>  |             |               |                        |             |             |                        |              |
| Age                            |             | 31.67 (3.3)   | 0(0%)                  |             | 31.0 (3.95) | 0(0%)                  | <b>0.029</b> |
| BMI, kg/m²                     | <18.5       | 13 (4.28%)    | 0(0%)                  | 11 (3.29%)  |             | 1 (0.30%)              | 0.843        |
|                                | 18.5≤BMI<25 | 231 (75.99%)  |                        | 250 (74.9%) |             |                        |              |
|                                | 25≤BMI<30   | 45 (14.8%)    |                        | 56 (16.8%)  |             |                        |              |
|                                | BMI≥30      | 15 (4.93%)    |                        | 16 (4.79%)  |             |                        |              |
| Maternal education             | Primary     | 38 (12.5%)    | 1 (0.33%)              | 48 (14.4%)  |             | 1 (0.30%)              | 0.287        |
|                                | Secondary   | 120 (39.47%)  |                        | 112 (33.5%) |             |                        |              |
|                                | University  | 145 (47.7%)   |                        | 173 (51.8%) |             |                        |              |
| Parity                         | 0           | 167 (54.93%)  | 0(0%)                  | 178 (53.3%) |             |                        | 0.758        |
|                                | 1           | 116 (38.16%)  |                        | 136 (40.7%) |             |                        |              |
|                                | 2+          | 21 (6.91%)    |                        | 20 (5.99%)  |             |                        |              |
| Ferritin level                 |             | 34.54 (26.11) | 1 (0.33%)              |             | 31.3 (28.1) |                        | 0.137        |
| PM <sub>2.5</sub> in pregnancy |             | 16.98 (2.43)  | 22 (7.24%)             | 16.9 (2.49) | 83 (24.85%) |                        | 0.726        |

Table S1. Cont.

|                    |     |             |          |             |            |       |
|--------------------|-----|-------------|----------|-------------|------------|-------|
| Smoking at week 32 | No  | 266 (87.5%) | 7 (2.3%) | 263 (78.7%) | 32 (9.58%) | 0.414 |
|                    | Yes | 31 (10.20%) |          | 39 (11.7%)  |            |       |

|                                        |     |             |           |            |            |       |
|----------------------------------------|-----|-------------|-----------|------------|------------|-------|
| <b>Alcohol intake during pregnancy</b> | No  | 271 (89.1%) | 2 (0.66%) | 283(95.3%) | 37 (11.1%) | 0.272 |
|                                        | Yes | 21 (6.91%)  |           | 14 (4.71%) |            |       |

T test for continuous variables and chi-squared for categorical variables

**Table S2.** Linear regression models for the association between Mn and the McCarthy scale scores. Change in the McCarthy scales for 1 µg/g increase in Mn and by tertiles of the Mn distribution including Family Context (Etxadi-Gangoiti SCLD subscale).

|                          |                | <b>Beta (CI 95%)</b>     |                         |                          |                     |                            |
|--------------------------|----------------|--------------------------|-------------------------|--------------------------|---------------------|----------------------------|
|                          |                | <b>Tertile 1</b>         | <b>Tertile 2</b>        | <b>Tertile 3</b>         | <b><i>p for</i></b> | <b>By 1 point</b>          |
| <b>Scale</b>             |                | <b>[0.0065 - 0.2316]</b> | <b>(0.2316- 0.4093]</b> | <b>(0.4093 - 2.1658]</b> | <b><i>trend</i></b> | <b>increment in the Mn</b> |
| <b>General cognitive</b> | <b>Model 1</b> | 1 (Ref.)                 | 0.75 (-3.79, 5.3)       | -0.68 (-5.37, 4.02)      | 0.784               | -1.34 (-7.06, 4.37)        |
| <b>Verbal</b>            | <b>Model 1</b> | 1 (Ref.)                 | 1.08 (-3.77, 5.92)      | 0.03 (-4.96, 5.02)       | 0.983               | -2.11 (-8.19, 3.97)        |
| <b>Perceptive-manip.</b> | <b>Model 1</b> | 1 (Ref.)                 | 0.07 (-4.47, 4.61)      | -0.43 (-5.12, 4.25)      | 0.857               | 0.72 (-4.99, 6.43)         |
| <b>Quantitative</b>      | <b>Model 1</b> | 1 (Ref.)                 | 0.2 (-4.44, 4.84)       | -1.67 (-6.46, 3.12)      | 0.497               | -2.48 (-8.31, 3.36)        |
| <b>Memory</b>            | <b>Model 1</b> | 1 (Ref.)                 | 1.3 (-3.54, 6.14)       | 0.79 (-4.2, 5.79)        | 0.749               | -1.62 (-7.7, 4.47)         |
| <b>Executive</b>         | <b>Model 1</b> | 1 (Ref.)                 | 1.01 (-3.56, 5.58)      | -0.69 (-5.4, 4.03)       | 0.783               | -1.82 (-7.57, 3.92)        |
| <b>Motor global</b>      | <b>Model 1</b> | 1 (Ref.)                 | 0.64 (-3.99, 5.28)      | -0.8 (-5.59, 3.98)       | 0.747               | 0.01 (-5.82, 5.85)         |
| <b>Gross motor</b>       | <b>Model 1</b> | 1 (Ref.)                 | 3.47 (-1.3, 8.24)       | 1.38 (-3.54, 6.3)        | 0.566               | 1.85 (-4.17, 7.87)         |
| <b>Fine motor</b>        | <b>Model 1</b> | 1 (Ref.)                 | -2.75 (-7.11, 1.6)      | -2.7 (-7.2, 1.79)        | 0.231               | -1.98 (-7.47, 3.52)        |

Model 2\*\*: also adjusted for age at the time of the test, sex, sibling order, nursery at 12 months and maternal education and Etxadi-Gangoiti Scale (Stimulation of Cognitive and Linguistic Development subscale).
